# Supplementary material
Source: publisher figshare collection journal article supplement (https://gsajournals.figshare.com/ndownloader/files/14515292)
Supplement: Supplementary file 1 [file 14515292]

## Sheet: Hoja1
Table S4. Parameters for the log-normal distribution of effect sizes, and the normal distribution of MAF values. The table also shows the distribution that gives the best fit in each case, as well as the AIC values for all the alternative distributions considered (the best fit is marked in bold).
		Distribution of effect sizes									Distribution of MAF values
Functional domain	Trait	Best fitted	meanlog	sdlog	AIC (lnorm)	AIC (norm)	AIC (gamma)	AIC (beta)	AIC (exp)	AIC (logis)	Best fitted	mean	sd	AIC (lnorm)	AIC (norm)	AIC (gamma)	AIC (beta)	AIC (exp)	AIC (logis)
		distribution									distribution
Cancer	Basal cell carcinoma	lnorm	-3.571	0.73	-183.5	-128.45	-171.85	-65.78	-168.59	-36.16	norm	0.245	0.13	-32.01	-43.08	-40.39	3.89	-29.05	18.56
	Chronic lymphocytic leukemia	lnorm	-3.261	0.462	-194.68	-176.25	-190.81	-17.7	-161.17	-8.88	norm	0.328	0.129	-34.02	-44.04	-39.16	-1.5	-6.63	26.74
	Colorectal cancer	lnorm	-3.569	0.596	-87.47	-76.95	-84.07	-54.83	108.34	-36.3	norm	0.277	0.136	-23.05	-48.96	-39.64	1.7	-24.03	21.88
	Lung cancer	lnorm	-2.724	0.589	-245.41	-173.13	-238.52	-104.89	-207.84	-148.94	gamma	0.177	0.142	-95.48	-68.4	-103.29	-6.25	-97.47	27.54
	Prostate cancer	lnorm	-3.104	0.896	-376.52	-89.74	-320.52	-352.07	-322.51	-274.38	norm	0.277	0.148	-57.07	-100.37	-87.43	-0.26	-58.19	61.42
	Prostate-specific antigen levels	lnorm	-2.613	0.741	-100.55	-53.57	-90.06	-40.72	-87.55	-13.7	norm	0.299	0.149	-15.78	-29.94	-24.3	-2.65	-12.55	25.85
	Testicular germ cell tumor	lnorm	-3.154	0.5	-253.47	-221.88	-247.46	-43.85	-212.16	-38.24	norm	0.295	0.114	-47.49	-76.17	-63.35	-1.04	-21.53	6.35
Cardiovascular	Atrial fibrillation	lnorm	-3.511	0.763	-147.24	-107.88	-138.68	-32.76	-136.86	-10.04	norm	0.305	0.14	-18.2	-31.2	-25.72	-1.92	-9.94	19.27
	Coronary artery disease	lnorm	-3.552	0.788	-218.86	-164.62	-208.1	-54.05	-204.97	-11.46	gamma	0.244	0.133	-50.87	-52.29	-55.81	3.6	-36.67	25.03
	Coronary heart disease	lnorm	-3.389	0.793	-163.3	-110.41	-152.9	-53.76	-151.51	-27.76	norm	0.284	0.133	-21.01	-41.58	-33.44	2.6	-17.76	18.91
	Myocardial infarction	lnorm	-3.555	0.848	-134.02	-102.29	-127.97	-27.94	-127.88	6.92	gamma	0.257	0.145	-23.13	-26.83	-27.57	1.66	-19.6	24.06
Dermatological	Atopic dermatitis	lnorm	-3.212	0.781	-126.59	-102.6	-124.91	-25.91	-120.82	-20.99	norm	0.315	0.129	-16.86	-36.07	-27.59	-2.55	-7.84	13.86
	Psoriasis	lnorm	-3.229	0.765	-207.85	-93.78	-180.79	-108.73	-180.89	-70.61	norm	0.283	0.136	-39.02	-54.52	-49.3	2.81	-24.62	28.06
	Vitiligo	lnorm	-2.886	0.57	-239.5	-191.79	-229.78	-42.61	-202.66	-24.89	norm	0.284	0.136	-37.04	-65.29	-54.28	1.73	-29.06	26.79
Endocrine	Body mass index	lnorm	-3.672	0.64	-1561.3	-561.77	-1313.81	-1313.6	-1302.6	-1084.1	norm	0.304	0.13	-99.14	-357.43	-249.65	-34.21	-108.97	62.53
	Menarche (age at onset)	lnorm	-3.174	0.293	-658.46	-588.43	-639.82	-195.37	-469.61	-146.73	norm	0.298	0.117	-128.7	-157.91	-144.85	1.65	-44.75	31.56
	Obesity	lnorm	-3.579	0.641	-209.57	-178.66	-203.53	-29.53	-191.28	-6.69	norm	0.311	0.124	-38.91	-51.06	-46.02	-0.78	-11.84	18.23
	Type 2 diabetes	lnorm	-3.429	0.597	-435.34	-340.31	-414.85	-132.72	-383.88	-99.68	norm	0.269	0.123	-98.88	-113.37	-110.82	3.12	-52.57	23.66
Gastrointestinal	Digestive disease	lnorm	-3.837	0.705	-1507.4	-1057.1	-1419.25	-776.58	-1377.2	-722.18	norm	0.286	0.129	-238.5	-340.72	-301.02	-9.59	-135.26	78.61
	Ulcerative colitis	lnorm	-3.716	0.692	-624.96	-410.33	-576.68	-260.48	-562.11	-206.27	norm	0.304	0.13	-90.42	-142.2	-120.95	-11.37	-43.4	34.99
Hematological	Glycated hemoglobin levels	lnorm	-3.81	0.838	-278.34	-134.47	-245.03	-143.34	-246.94	-75.25	norm	0.274	0.119	-57.7	-73.72	-68.35	3.07	-30.59	12.94
	Mean platelet volume	lnorm	-3.063	0.621	-1043.1	-686.28	-961.72	-599.28	-894.52	-431.3	norm	0.257	0.15	-108.58	-231.8	-204.2	2.87	-175.48	135.61
	Monocyte count	beta	-3.117	0.684	-864.46	-83.44	-692.26	-1131.9	-689.41	-906.5	norm	0.26	0.149	-58.45	-199.35	-163.97	1.53	-143.06	112.63
	Neutrophil traits	lnorm	-3.263	0.632	-1175.2	-500.69	-1017.29	-1073.6	-986.06	-898.6	norm	0.285	0.148	-25.14	-246.32	-163.03	-13.52	-128.73	131.45
	Red blood cell count	lnorm	-2.863	1.536	-95.44	-23.33	-94.67	-82.46	-90.03	-33.39	norm	0.305	0.132	-40.09	-55.5	-48.63	0.99	-16.53	28.29
Immunological	Primary biliary cholangitis	lnorm	-3.028	0.479	-225.88	-198.28	-219.95	-42.52	-184.6	-27.49	norm	0.301	0.128	-44.56	-58.29	-52.84	-2.76	-17.6	24.55
	Rheumatoid arthritis	lnorm	-3.402	0.79	-452.95	-254.34	-408.01	-207.15	-405.44	-125.4	norm	0.299	0.125	-89.56	-131.41	-113.67	-5.56	-40.53	26.95
	Systemic lupus erythematosus	lnorm	-2.835	0.747	-265.87	-218.01	-259.59	-30.27	-244.23	10.8	gamma	0.252	0.134	-77.92	-89.25	-89.88	3.94	-57.65	33.24
	Type 1 diabetes	lnorm	-3.323	0.864	-159.97	-64.64	-138.94	-81.36	-140.84	-54.19	norm	0.317	0.126	-32.24	-48.33	-40.15	-1.41	-9.91	17.5
Metabolic	Cholesterol	lnorm	-2.835	0.776	-530.45	-293.97	-481.21	-275.94	-468.35	-194.6	norm	0.236	0.137	-131.84	-176.78	-173.26	-0.31	-138.66	63.35
	HDL	beta	-2.836	0.974	-391.64	11.94	-300.93	-419.6	-298.08	-177	norm	0.244	0.142	-20.95	-142.46	-112.67	1.06	-110.3	60.81
	Triglycerides	lnorm	-2.864	0.837	-278.43	-62.27	-235.01	-248.05	-236.03	-171.7	norm	0.253	0.144	-59.45	-86.4	-81.78	3.68	-62.9	48.89
	Urate levels	beta	-2.727	0.873	-99.94	-0.83	-75.72	-109.41	-77.61	-39.58	norm	0.321	0.132	-6.02	-39.37	-23.29	-5.53	-7.73	15
Neurological	Migraine	lnorm	-4.086	0.558	-288.58	-257.54	-282.15	-41.84	-260.43	-21.7	norm	0.255	0.145	-29.59	-41.94	-39.99	-2.9	-31.02	31.54
	Parkinson's disease	lnorm	-3.444	0.976	-241.86	-82.36	-209.45	-184.69	-210.7	-102.9	norm	0.252	0.147	-17.8	-55.86	-46.24	2.98	-43.27	35.4
Psychiatric	Schizophrenia	lnorm	-4.15	0.442	-840.22	-716.01	-810.73	-207.93	-719.02	-199.3	norm	0.296	0.123	-114.14	-157.53	-139.7	-7.9	-49.83	24.84
Skeletal	Bone mineral density	lnorm	-2.87	0.43	-285.22	-240.39	-274.12	-56.44	-220.18	-35.67	norm	0.303	0.112	-84.69	-93.14	-90.68	0.31	-22.29	14.32
	Height	lnorm	-3.363	0.53	-1780	-1523	-1762.7	-889.02	-1535.4	-987.6	norm	0.298	0.127	18.56	-441.12	-251.76	-24.45	-144.31	53.1
	Waist circumference	lnorm	-3.557	0.351	-320.97	-291.44	-313.04	-39.83	-251.65	-18.25	norm	0.315	0.11	-53.74	-76.64	-64.72	-3.22	-13.76	7.37
	Waist-hip ratio	lnorm	-3.539	0.258	-315.81	-305.98	-313.5	-25.74	-228.41	-17.7	norm	0.313	0.098	-61.16	-78.71	-69.9	-1.47	-12.96	2.62
	Waist-related traits	lnorm	-3.533	0.281	-861.72	-815.48	-850.06	-119.39	-635.39	-119.9	norm	0.313	0.113	-103.99	-190.95	-149.21	-24.67	-39.36	-1.47
	Waist-to-hip related traits	beta	-3.25	0.669	-415.67	-69.24	-322.52	-425.91	-323.94	-282.1	norm	0.303	0.131	13.26	-111.71	-57.21	-4.83	-34.3	22.55
